# Supplementary material for: Fabrication of Mn-TPP/RGO Tailored Glassy Carbon Electrode for Doxorubicin Sensing
Source: PubMed Central journal article supplement — ACS Omega. 2024 Jun 6;9(24):25694–703. doi: 10.1021/acsomega.3c09026 (PMC11191129; doi:10.1021/acsomega.3c09026), 2024-06-06
Supplement: ao3c09026_si_001.pdf [file ao3c09026_si_001.pdf]

# Fabrication of Mn-TPP/RGO Tailored Glassy Carbon Electrode for Doxorubicin Sensing

Rafia Zafar, Syeda Aqsa Batool Bukhari, and Habib Nasir\*

School of Natural Sciences (SNS), National University of Sciences and Technology (NUST),  
Sector H-12, Islamabad 44000, Pakistan

\*Corresponding author's email: habibnasir@sns.nust.edu.pk

## Schemes

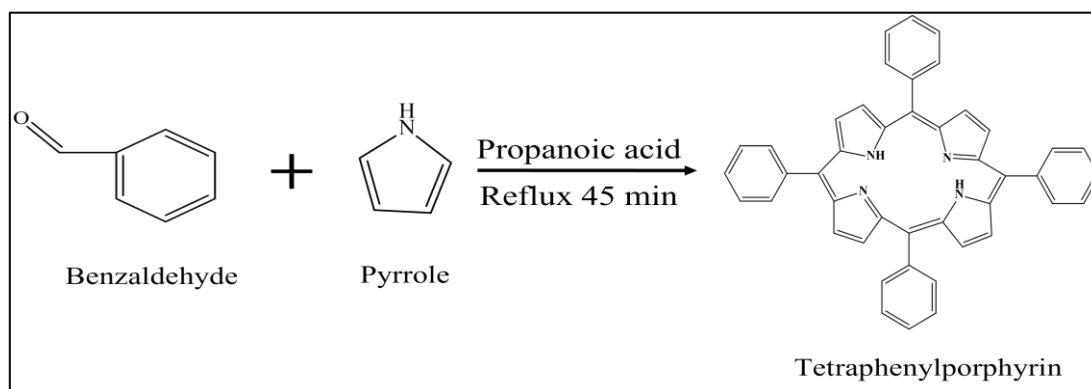

**Scheme S1.** Synthesis scheme of TPP.

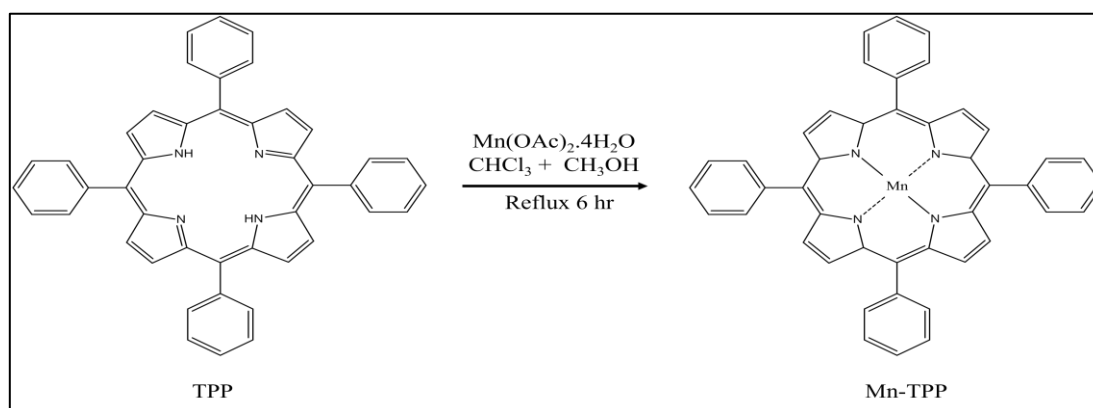

**Scheme S2.** Synthesis scheme of Mn-TPP.

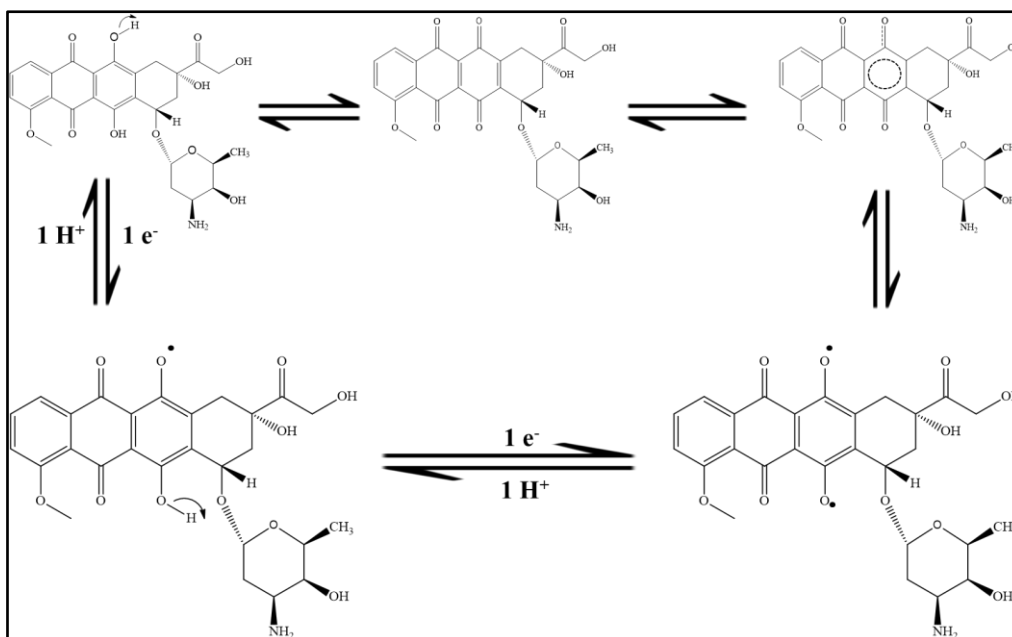

**Scheme S3.** Electrochemical oxidation of DOX.

## Figures

### *Electrode Fabrication*

The electrode was fabricated by following the procedure mentioned in literature <sup>1</sup>. The diameter of GCE was 3mm with geometrical surface area of 0.07 cm<sup>2</sup>. Following is the image of fabricated electrode in Figure S1.

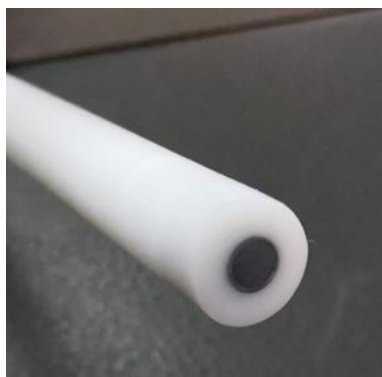

**Figure S1.** Optical image of Mn-TPP/RGO/GCE fabricated electrode with geometrical surface area of 0.07 cm<sup>2</sup>.

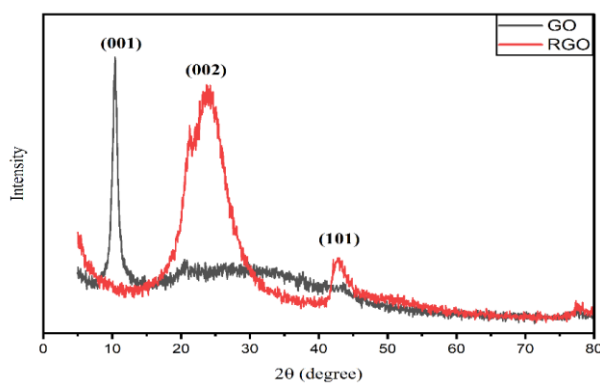

**Figure S2.** XRD Spectra of GO and RGO.

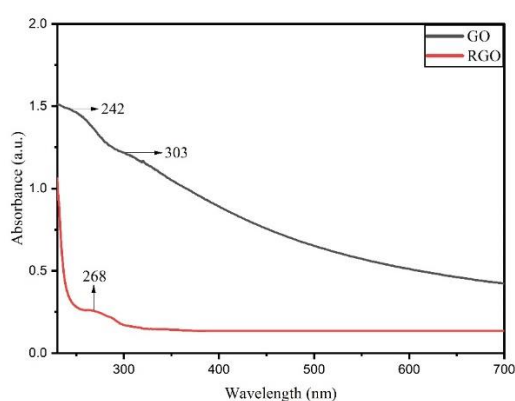

**Figure S3.** UV/vis analysis of GO and RGO.

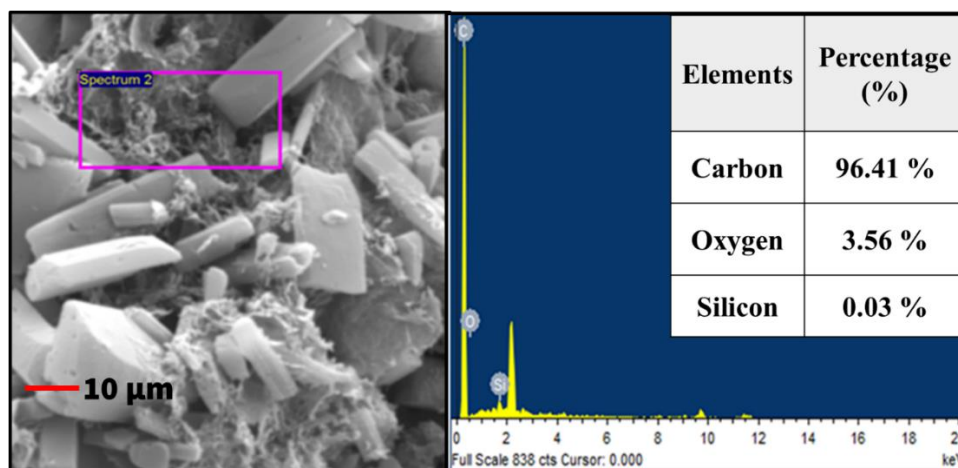

**Figure S4.** SEM and EDS analysis of TPP/RGO.

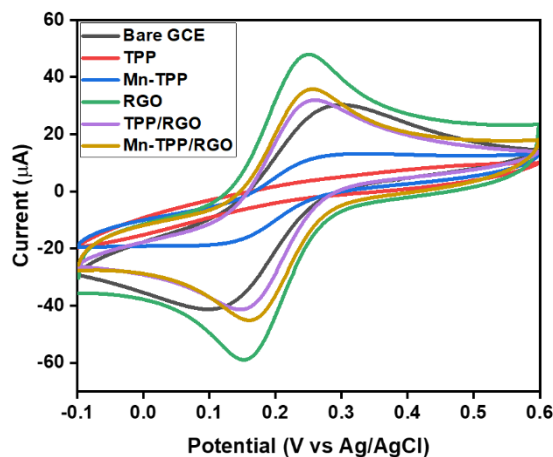

**Figure S5.** Cyclic voltammetric analysis of Bare GCE, TPP, Mn-TPP, RGO, TPP/RGO and Mn-TPP/RGO in 0.5mM potassium ferricyanide solution.

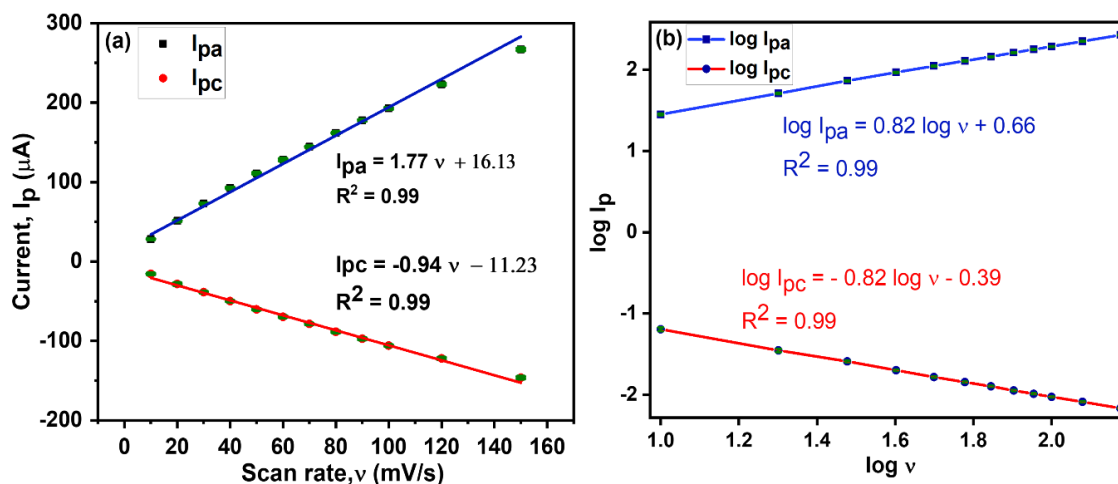

**Figure S6.** Calibration graphs of (a) scan rate vs. redox current and (b) logarithmic relationship of scan rate versus anodic peak current.

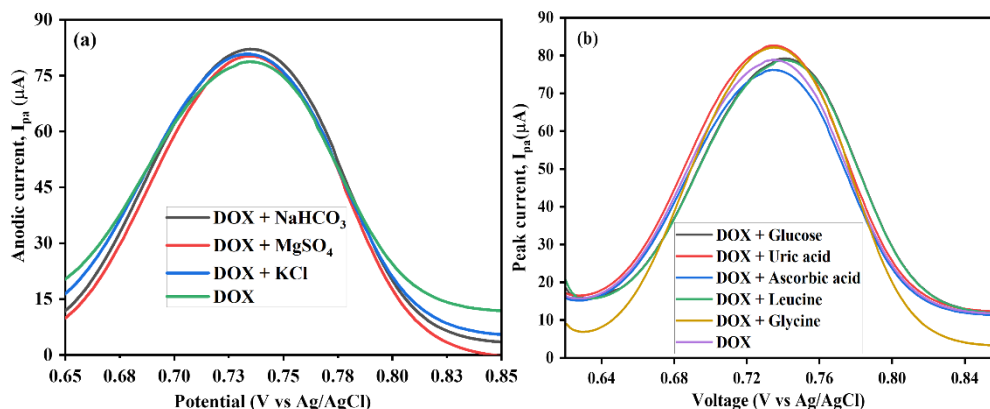

**Figure S7.** DPV studies of selectivity of Mn-TPP/RGO/GCE towards DOX in the presence (a) inorganic compounds (b) biomolecules commonly present in the blood serum.

## Tables

**Table S1.** Statistical data of EIS analysis of modified electrodes in 0.5 mM potassium ferricyanide solution.

| Sr. No | Modified electrodes | Charge Transfer Resistance ( $R_{ct}$ ) | Solution Resistance ( $R_u$ ) | Interfacial Capacitance ( $C_{dl}$ ) |
|--------|---------------------|-----------------------------------------|-------------------------------|--------------------------------------|
| 1      | TPP                 | 40.70 k $\Omega$                        | 149.7 $\Omega$                | 709.5 x 10 <sup>-9</sup> F           |
| 2      | Bare GCE            | 29.43 k $\Omega$                        | 308.8 $\Omega$                | 13.06 x 10 <sup>-6</sup> F           |
| 3      | Mn-TPP              | 25.34 k $\Omega$                        | 169.1 $\Omega$                | 22.59 x 10 <sup>-6</sup> F           |
| 4      | RGO                 | 3.905 k $\Omega$                        | 137.5 $\Omega$                | 325.9 x 10 <sup>-6</sup> F           |
| 5      | TPP/RGO             | 984.5 $\Omega$                          | 149.4 $\Omega$                | 9.37 x 10 <sup>-6</sup> F            |
| 6      | Mn-TPP/RGO          | 722.9 $\Omega$                          | 212.0 $\Omega$                | 101.2 x 10 <sup>-6</sup> F           |

**Table S2.** Data of selectivity studies for Mn-TPP/RGO/GCE towards DOX.

| Interfering agents       | Current ( $\mu$ A) | Tolerance (%) |
|--------------------------|--------------------|---------------|
| DOX                      | 78.57              | --            |
| DOX + KCl                | 80.65              | -2.7%         |
| DOX + NaHCO <sub>3</sub> | 82.09              | -4.5%         |
| DOX + MgSO <sub>4</sub>  | 80.11              | -1.9%         |
| DOX + Glucose            | 78.74              | -0.21         |
| DOX + Ascorbic acid      | 75.68              | +3.7%         |
| DOX + Leucine            | 78.91              | -0.43%        |

|                        |       |       |
|------------------------|-------|-------|
| <b>DOX + Glycine</b>   | 81.97 | -4.3% |
| <b>DOX + Uric acid</b> | 82.61 | -5.1% |

**Table S3.** Comparison of working ability of Mn-TPP/RGO/GCE with electrodes present in literature for the detection of DOX.

| <b>Sr No.</b> | <b>Sensors</b>                    | <b>Method</b> | <b>LOD</b>                           | <b>Sensitivity</b>                                                  | <b>Linear range</b>         | <b>References</b> |
|---------------|-----------------------------------|---------------|--------------------------------------|---------------------------------------------------------------------|-----------------------------|-------------------|
| 1.            | Nano-TiO <sub>2</sub> /nafion/GCE | CV            | 1 nM/L                               | 207.3 $\mu\text{A}\mu\text{M}^{-1}\text{cm}^{-2}$                   | 5 – 2 nM/L                  | <sup>2</sup>      |
| 2.            | RGO/Au nanoparticles/Ppy/GCE      | CV, EIS       | 0.02 $\mu\text{M}$                   | 185 $\mu\text{A}\text{mM}^{-1}\text{cm}^{-2}$                       | 0.02 $\mu\text{M}$ – 25 mM  | <sup>3</sup>      |
| 3.            | FeV/SCNF                          | LSV           | 5 nM                                 | 46.04 $\mu\text{A}\text{mM}^{-1}\text{cm}^{-2}$                     | 20 nM – 542.5 $\mu\text{M}$ | <sup>4</sup>      |
| 4.            | VMSF/p-GCE                        | CV, DPV       | 0.2 nM                               | 23.94 $\mu\text{A}\text{mM}^{-1}\text{cm}^{-2}$                     | 0.5 nM to 23 $\mu\text{M}$  | <sup>5</sup>      |
| <b>5.</b>     | <b>Mn-TPP/RGO/GCE</b>             | <b>CV</b>     | <b>63.5 <math>\mu\text{M}</math></b> | <b>112.09 <math>\mu\text{A}\text{mM}^{-1}\text{cm}^{-2}</math></b>  | <b>0.1-0.6 mM</b>           | <b>This work</b>  |
| <b>6.</b>     | <b>Mn-TPP/RGO/GCE</b>             | <b>DPV</b>    | <b>27.0 <math>\mu\text{M}</math></b> | <b>0.174 <math>\mu\text{A}\mu\text{M}^{-1}\text{cm}^{-2}</math></b> | <b>0.1-0.6 mM</b>           | <b>This work</b>  |

## References

1. Bukhari, S. A. B.; Nasir, H.; Pan, L.; Tasawar, M.; Sohail, M.; Shahbaz, M.; Gul, F.; Sitara, E., Supramolecular assemblies of carbon nanocoils and tetraphenylporphyrin derivatives for sensing of catechol and hydroquinone in aqueous solution. *Scientific Reports* **2021**, *11* (1), 5044.
2. Fei, J.; Wen, X.; Zhang, Y.; Yi, L.; Chen, X.; Cao, H., Voltammetric determination of trace doxorubicin at a nano-titania/nafion composite film modified electrode in the presence of cetyltrimethylammonium bromide. *Microchimica acta* **2009**, *164* (1), 85-91.
3. Behravan, M.; Aghaie, H.; Giahhi, M.; Maleknia, L., Determination of doxorubicin by reduced Graphene oxide/gold/Polypyrrole modified glassy carbon electrode: A new preparation strategy. *Diamond and Related Materials* **2021**, 108478.
4. Rajaji, U.; Chen, S.-M.; Raghu, M.; Parashuram, L.; Alzahrani, F. M.; Alsaiani, N. S.; Ouladsmame, M., Deep eutectic solvent synthesis of iron vanadate-decorated sulfur-doped carbon nanofiber nanocomposite: electrochemical sensing tool for doxorubicin. *Microchimica Acta* **2021**, *188* (9), 1-13.
5. Wang, M.; Lin, J.; Gong, J.; Ma, M.; Tang, H.; Liu, J.; Yan, F., Rapid and sensitive determination of doxorubicin in human whole blood by vertically-ordered mesoporous silica film modified electrochemically pretreated glassy carbon electrodes. *RSC advances* **2021**, *11* (15), 9021-9028.
